# Activation of the AMP-Activated Protein Kinase by Eicosapentaenoic Acid (EPA, 20:5 n-3) Improves Endothelial Function *In Vivo*

Yong Wu<sup>1</sup>, Cheng Zhang<sup>1</sup>, Yunzhou Dong<sup>1</sup>, Shuangxi Wang<sup>1</sup>, Ping Song<sup>1</sup>, Benoit Viollet<sup>2</sup>, Ming-Hui Zou<sup>1\*</sup>

**1** Division of Endocrinology and Diabetes, Department of Medicine, University of Oklahoma Health Science Center, Oklahoma City, Oklahoma, United States of America, **2** Département de Génétique, Développement et Pathologie Moléculaire, Institut Cochin, Université René Descartes Paris 5, Institut National de la Santé et de la Recherche Médicale U567, Centre National de la Recherche Scientifique UMR8104, Paris, France

## Abstract

The aim of the present study was to test the hypothesis that the cardiovascular-protective effects of eicosapentaenoic acid (EPA) may be due, in part, to its ability to stimulate the AMP-activated protein kinase (AMPK)-induced endothelial nitric oxide synthase (eNOS) activation. The role of AMPK in EPA-induced eNOS phosphorylation was investigated in bovine aortic endothelial cells (BAEC), in mice deficient of either AMPK $\alpha$ 1 or AMPK $\alpha$ 2, in eNOS knockout (KO) mice, or in Apo-E/AMPK $\alpha$ 1 dual KO mice. EPA-treatment of BAEC increased both AMPK-Thr172 phosphorylation and AMPK activity, which was accompanied by increased eNOS phosphorylation, NO release, and upregulation of mitochondrial uncoupling protein-2 (UCP-2). Pharmacologic or genetic inhibition of AMPK abolished EPA-enhanced NO release and eNOS phosphorylation in HUVEC. This effect of EPA was absent in the aortas isolated from either eNOS KO mice or AMPK $\alpha$ 1 KO mice fed a high-fat, high-cholesterol (HFHC) diet. EPA via upregulation of UCP-2 activates AMPK $\alpha$ 1 resulting in increased eNOS phosphorylation and consequent improvement of endothelial function *in vivo*.

**Citation:** Wu Y, Zhang C, Dong Y, Wang S, Song P, et al. (2012) Activation of the AMP-Activated Protein Kinase by Eicosapentaenoic Acid (EPA, 20:5 n-3) Improves Endothelial Function *In Vivo*. PLoS ONE 7(4): e35508. doi:10.1371/journal.pone.0035508

**Editor:** Yu Huang, The Chinese University of Hong Kong, Hong Kong

**Received:** February 6, 2012; **Accepted:** March 16, 2012; **Published:** April 19, 2012

**Copyright:** © 2012 Wu et al. This is an open-access article distributed under the terms of the Creative Commons Attribution License, which permits unrestricted use, distribution, and reproduction in any medium, provided the original author and source are credited.

**Funding:** This work was supported by National Institutes of Health Grants (HL079584, HL080499, HL07439, HL089920, HL096032, HL105157, and HL110448). MZ is a recipient of the National Established Investigator of the American Heart Association. The funders had no role in study design, data collection and analysis, decision to publish, or preparation of the manuscript.

**Competing Interests:** The authors have declared that no competing interests exist.

\* E-mail: ming-hui-zou@ouhsc.edu

## Introduction

Eicosapentaenoic acid (20:5 $\Delta$ (5,8,11,14,17);  $\omega$ -3: EPA) is an  $\omega$ -3 polyunsaturated fatty acid (PUFA), which is abundant in fish oils. Epidemiological and clinical trials have shown that  $\omega$ -3 fatty acids, in particular EPA, reduce cardiovascular deaths [1] and retard the progression of atherosclerosis in coronary patients [2]. The precise mechanism by which fish oils inhibit atherosclerosis is still unclear, but it may relate to the modulation of lipid metabolism [3], improvement of vascular endothelial function [4], enhancement of vascular reactivity and compliance [5], reduction of cytokine production [6], and inhibition of inflammatory processes [7].

Nitric oxide (NO) is essential for endothelial function. Decreased NO bioactivity is involved in the pathogenesis of many cardiovascular disorders such as hypertension, atherosclerosis, venous bypass graft disease, diabetic vascular disease [8]. There is evidence that the beneficial effects of EPA may be due to its ability to augment levels of NO. In diabetic rats, long term oral administration of EPA may stimulate NO production, and increased NO levels likely inhibit enhanced cardiac sympathetic activity in these animals [9]. Similarly, the n-3 fatty acids promote the synthesis of beneficial NO in the endothelium [10]. In rabbits, EPA reduces myocardial infarct size, primarily through calcium

channel-mediated mechanisms and partially through NO-mediated mechanisms [11]. Accumulating evidence shows that  $\omega$ -3 PUFA can regulate NOS activity and increase NO synthesis in endothelial cells and vascular smooth muscle cells [12,13]. However, the mechanisms underlying  $\omega$ -3 PUFA-enhanced NO release remain poorly understood.

The AMP-activated protein kinase (AMPK) is a heterotrimeric protein composed of  $\alpha$ ,  $\beta$ , and  $\gamma$  subunits. The  $\alpha$  subunit imparts catalytic activity, while the  $\beta$  subunit contains a glycogen-binding domain (GBD) that also regulates the activity and the  $\gamma$  subunit forms the broad base of the protein and is required for AMP binding [14,15]. AMPK is well-conserved among eukaryotic cells and is expressed by endothelial cells of different origins [16,17,18]. Activation of AMPK requires phosphorylation of Thr172 in the activation loop of the  $\alpha$  subunit [19] and is mediated by at least two kinases, Peutz-Jeghers syndrome kinase LKB1 [20] and Ca<sup>2+</sup>/calmodulin-dependent protein kinase kinase (CaMKK) [21]. AMPK has been shown to mediate angiogenic and anti-inflammatory effects, which are thought to be due to NO formation [17,22,23,24]. AMPK is reported to phosphorylate endothelial nitric oxide synthase (eNOS) at Ser1177 or 1179 [17,22] and enhance the interaction between eNOS and heat shock protein 90 [25]. Based on these reports, we hypothesized that the protective effects of EPA on the cardiovascular system

may be due, in part, to the ability of EPA to stimulate AMPK-induced eNOS activation and consequently, NO production. Here, we provide evidence of a novel pathway in which EPA activates AMPK in endothelial cells through an upregulation of UCP-2.

## Results

### EPA induces AMPK phosphorylation and activation

To investigate whether EPA activates AMPK in endothelial cells, confluent BAEC or HUVEC were treated with varying concentrations of EPA for 2 to 24 h. AMPK activation was indirectly assessed by western blot analysis of AMPK phosphorylation at Thr172, which is essential for AMPK activity [26]. Ser79 phosphorylation of ACC, a substrate of AMPK [27], was also used as an indicator of AMPK activation. As shown in Figure 1A, the phosphorylation of both AMPK and ACC gradually increased beginning from 6 h after incubation with 25  $\mu$ M of EPA and reached peak levels at 24 h in BAEC. Increased AMPK phosphorylation was associated with elevated AMPK activity, as measured by the SAMS peptide assay (Figure 1C). EPA treatment did not alter total levels of AMPK and ACC, suggesting that EPA-induced phosphorylation of AMPK and ACC was not due to altered expression of these proteins. Since EPA activated AMPK in both BAEC and HUVEC at similar potency (data not shown), we performed most of the experiments in BAEC.

We next examined the dose-dependent effects of EPA on AMPK-Thr172 and ACC-Ser79 phosphorylation. EPA did not affect phosphorylation of AMPK or ACC at a concentration of

5  $\mu$ M (Figure 1B). In contrast, EPA at 25  $\mu$ M significantly enhanced AMPK phosphorylation (Figure 1B). Increasing concentrations of EPA (50 and 100  $\mu$ M) further enhanced AMPK phosphorylation. The changes in ACC phosphorylation mirrored those of AMPK. Levels of total AMPK and ACC remained unchanged at all EPA concentrations tested. Based on these results, 25  $\mu$ M appears to be the lowest effective concentration of EPA. Thus, BAEC were stimulated with 25  $\mu$ M EPA for 24 h in subsequent experiments.

### EPA-induced eNOS phosphorylation is AMPK-dependent

We had previously demonstrated that AMPK phosphorylates and activates endothelial nitric oxide synthase (eNOS) in cultured endothelial cells [23]. Similarly, Zhang *et al.* [28] demonstrated that infection of endothelial cells with a recombinant adenovirus expressing the constitutively active AMPK results in eNOS activation and increased NO production. Treatment of BAEC with EPA increased eNOS-Ser1179 phosphorylation, with the time-course of phosphorylation being very similar to that for AMPK phosphorylation (Figure 2A). The dose-dependent effects of EPA on eNOS phosphorylation were also similar to those for AMPK phosphorylation (Figure 2B). Given that EPA activates both AMPK and eNOS in BAEC, we then investigated whether the EPA-stimulated eNOS phosphorylation involves AMPK by infecting BAEC with adenovirus encoding dominant negative AMPK (Ad-DN-AMPK). As expected, treatment of control BAEC (Ad-GFP-infected or non-infected BAEC) with 25  $\mu$ M EPA for 24 h elicited increased phosphorylation of both AMPK and eNOS (Figure 2C). In contrast, overexpression of Ad-DN-AMPK

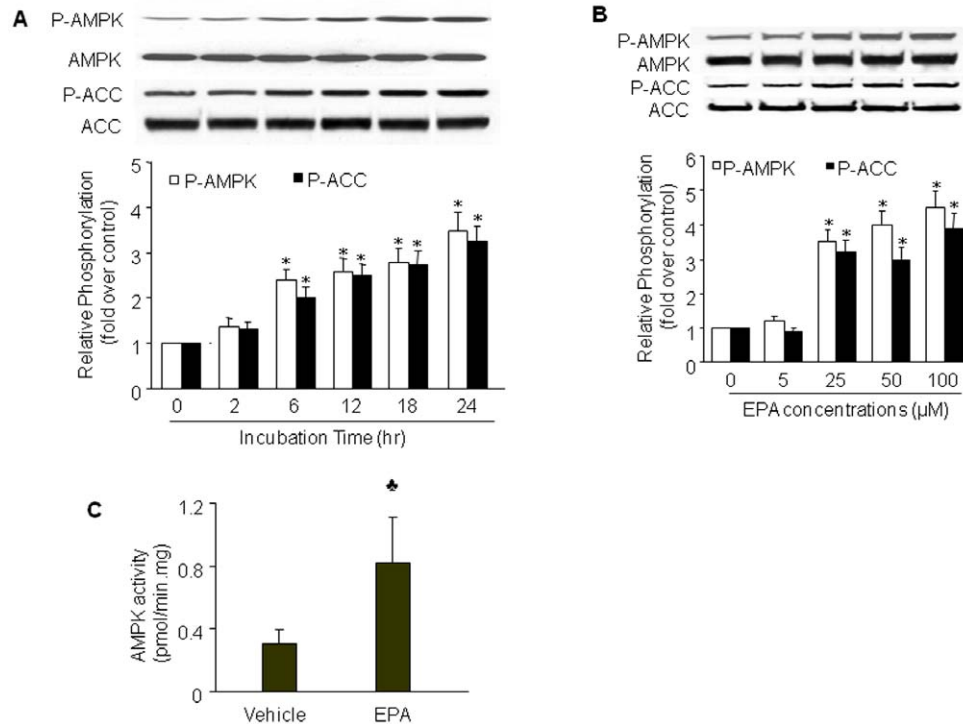

**Figure 1. EPA activates AMPK in BAEC.** BAEC were treated with (A) 25  $\mu$ mol/L EPA for the indicated times or (B) varying concentrations of EPA for 24 h. Lysates (80  $\mu$ g) were analyzed by western blot for the indicated proteins. The blot is a representative of four blots obtained from four separate experiments. Corresponding densitometric analyses of phosphorylated AMPK and ACC are shown. \*,  $P < 0.05$  vs. control groups. (C) Confluent BAECs were treated with vehicle or EPA (25  $\mu$ mol/L) for 24 hours. AMPK activity was assayed using the SAMS peptide as a substrate. Data presented are means  $\pm$  SD from 3 independent experiments.  $P < 0.05$  vs. vehicle. doi:10.1371/journal.pone.0035508.g001

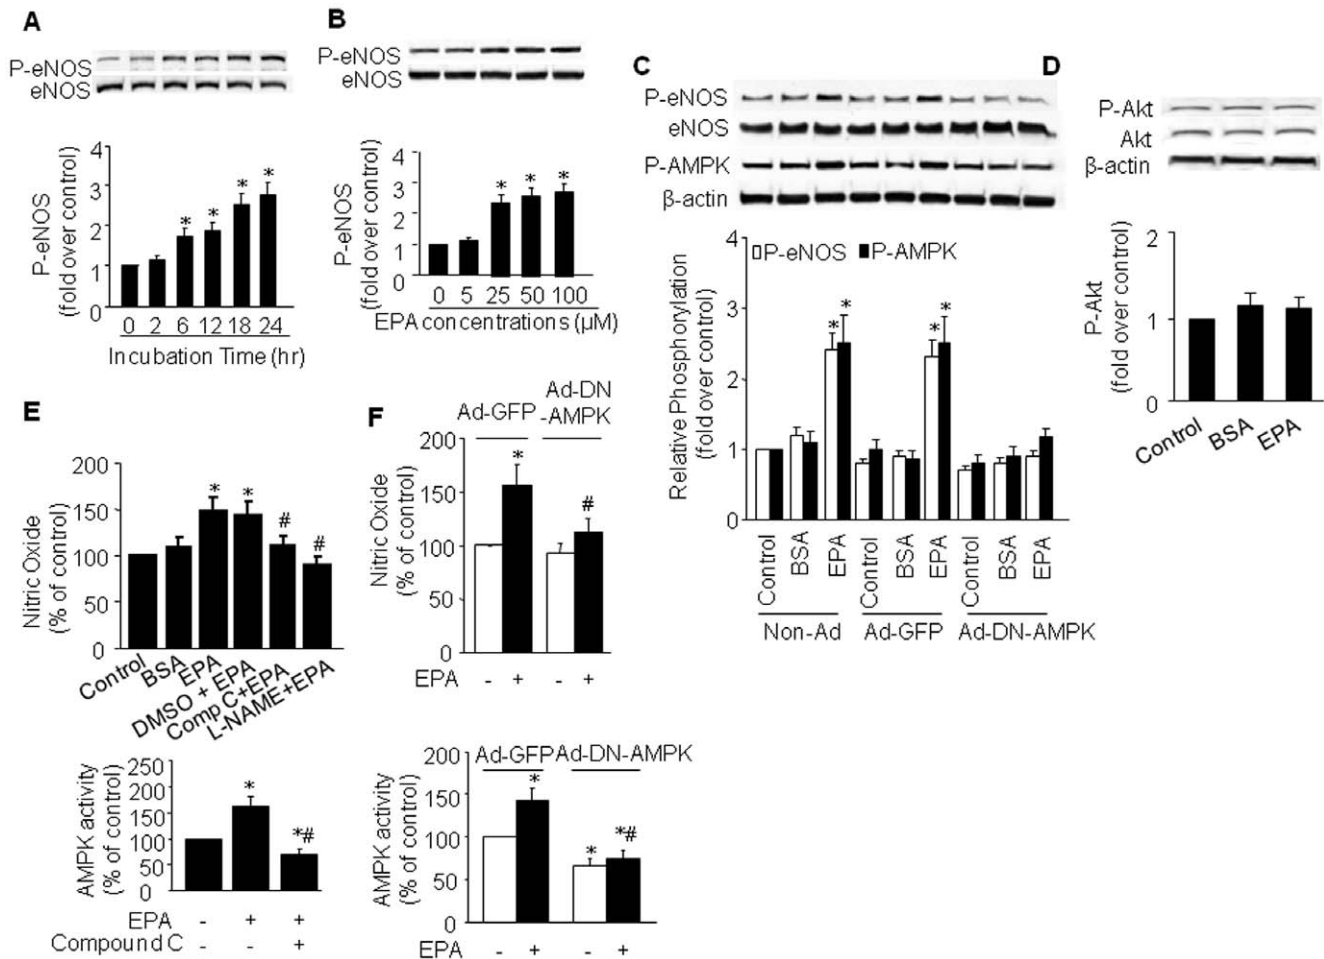

**Figure 2. AMPK mediates EPA-induced eNOS phosphorylation and NO production in BAEC.** BAEC were treated with (A) EPA 25  $\mu\text{mol/L}$  for the indicated times or (B) varying concentrations of EPA for 24 h. Lysates were analyzed by western blot for the indicated proteins. The blot is a representative of four blots obtained from four separate experiments. (C) Western blot of phosphorylated AMPK and eNOS in EPA-stimulated BAEC infected with adenoviruses encoding GFP or Ad-DN-AMPK. (D) Phosphorylation of Akt in EPA-stimulated BAEC. The data in C and D represent results of 3 separate experiments. For A–D, corresponding densitometric analyses are shown.  $*P < 0.05$  vs. control. (E) NO release in EPA-stimulated BAEC. BAEC were treated with compound C (AMPK inhibitor) (20  $\mu\text{mol/L}$ ), DMSO (vehicle), or L-NAME (NOS inhibitor) (0.1 mM) for 30 min prior to stimulation with EPA.  $n = 4$  for each treatment group.  $*P < 0.05$  vs. control;  $\#P < 0.05$  vs. EPA. (F) NO release by EPA-stimulated BAEC infected with Ad-DN-AMPK (50 multiplicities of infection) or Ad-GFP (control).  $*P < 0.05$  vs. non EPA-treated, Ad-GFP group;  $\#P < 0.05$  vs. EPA-treated, Ad-GFP group. For A and B, the corresponding AMPK activity is shown in the lower panel. doi:10.1371/journal.pone.0035508.g002

completely abolished EPA-induced eNOS Ser1179 (equal to Ser1177 in human) phosphorylation.

Both Akt and AMPK are capable of phosphorylating eNOS at Ser1179 [29], prompting us to determine whether Akt may also contribute to EPA-enhanced eNOS phosphorylation. As shown in Figure 2D, EPA did not increase basal Akt phosphorylation at Ser473, suggesting that EPA-stimulated eNOS phosphorylation does not require Akt but depends on activation of AMPK.

#### EPA-enhanced NO production is AMPK-dependent

Next, we determined if EPA-induced eNOS phosphorylation is associated with increased NO release. EPA significantly increased NO release, which was inhibited by L-NAME, a non-selective inhibitor of NOS (Figure 2E). In addition, inhibition of AMPK with compound C or through infection with Ad-DN-AMPK ablated EPA-enhanced NO release (Figure 2E and F). Importantly, both treatments reduced AMPK activity in EPA-treated cells to below control levels (Figure 2E and F).

#### UCP-2 is required for EPA-induced AMPK phosphorylation

AMPK is activated by an increase in the AMP/ATP ratios and by ATP depletion [30]. Because intracellular ATP production rests mainly on mitochondrial  $\Delta\Psi$  [31], we tested the effect of EPA on the expression of the mitochondrial proton carrier, uncoupling protein 2 (UCP-2). UCP-2 levels were quantified in BAEC treated with 25  $\mu\text{M}$  of EPA for up to 24 h. The increase in UCP-2 protein occurred by 5.5 h and appeared to reach a plateau by 24 h (Figure 3A).

We next determined if genetic inhibition of UCP-2 altered EPA-induced AMPK activation. Since siRNA for bovine UCP-2 was not available, we performed these experiments in HUVEC. As shown in Figure 3B, transfection of UCP-2 siRNA but not scrambled siRNA markedly reduced the basal levels of UCP-2 in HUVEC, implying that HUVEC expressed detectable levels of UCP-2 sensitive to UCP-2-specific siRNA. Moreover, transfection of UCP-2-specific siRNA but not scrambled siRNA significantly

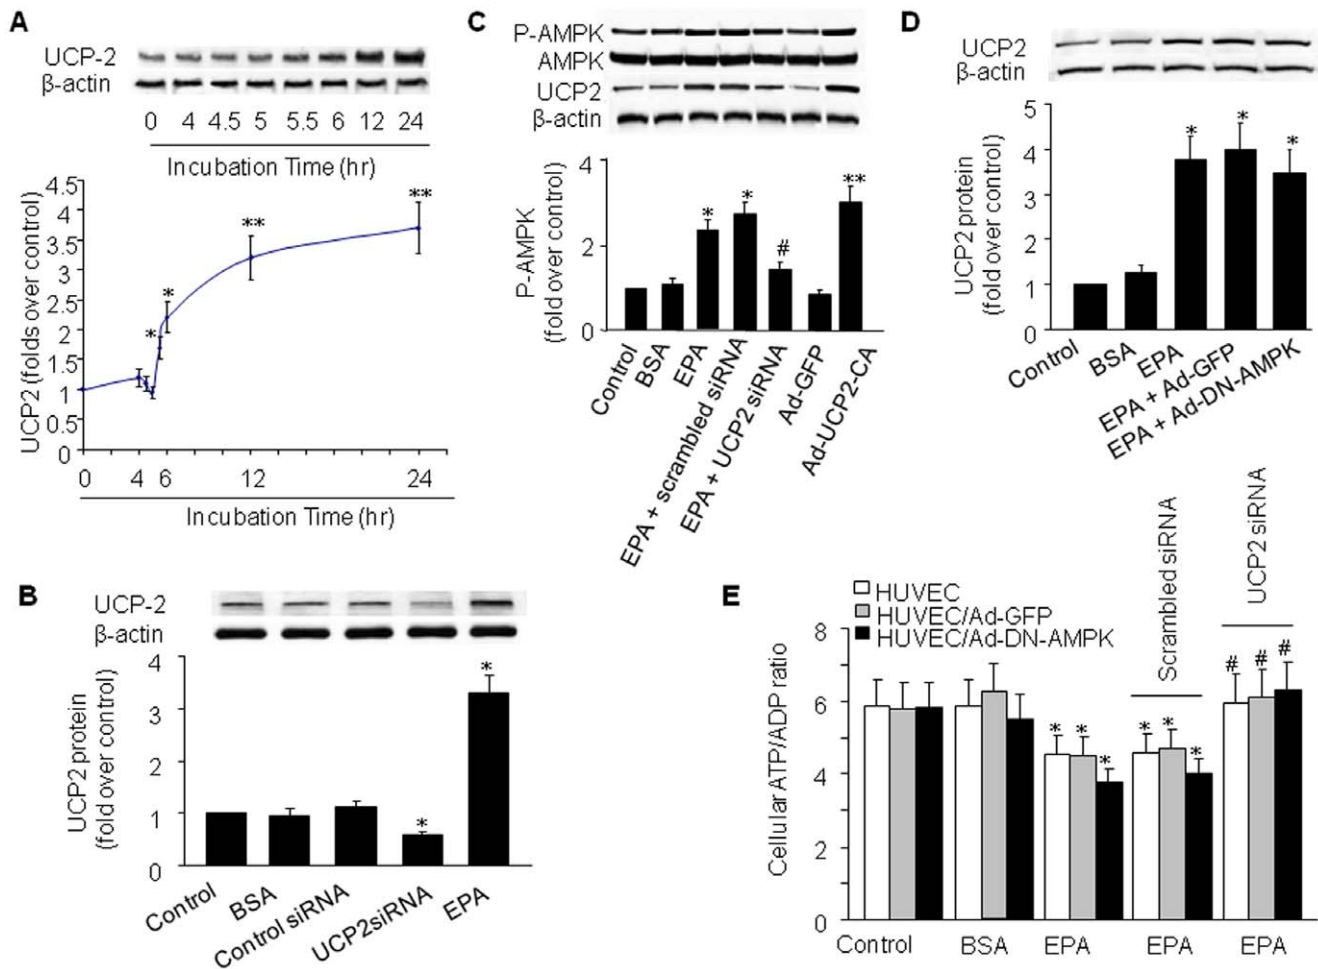

**Figure 3. EPA induces AMPK phosphorylation through UCP-2-dependent ATP inhibition.** **A)** Time course of EPA upregulation of UCP-2. BAEC were incubated with 25  $\mu$ M EPA for various amounts of time. After the appropriate incubation time, cells were lysed and UCP-2 protein levels were measured as described.  $n=4$ , \* $P<0.05$ ; \*\* $P<0.01$  vs. 0 h time point. **B)** UCP-2 siRNA significantly suppressed basal UCP-2 protein levels. HUVEC were incubated with UCP-2-specific siRNA, scrambled siRNA, EPA and its vehicle BSA for 24 h followed by analysis of UCP-2 protein levels. **C)** Western blot analysis of AMPK and UCP-2 in EPA-stimulated HUVEC. HUVECs were pretreated with UCP-2-specific siRNA (1  $\mu$ g/30-mm dish), scrambled siRNA, or siRNA transfection reagent. Alternatively, a subset was infected with Ad-CA-UCP-2 or Ad-GFP (control) prior to stimulation. The blot is a representative of four blots obtained from four separate experiments. **D)** Western blot analysis of UCP-2 in EPA-stimulated HUVEC infected with Ad-DN-AMPK (50 multiplicities of infection). Cells left non-infected (non-ad) or infected with Ad-GFP served as controls. The data represent results of three separate experiments. For C and D, corresponding densitometric analyses are shown. **E)** Intracellular ATP/ADP ratio in EPA-stimulated cultures pretreated with scrambled or UCP-2-specific siRNA. Results are expressed as mean  $\pm$  SD from three independent experiments conducted in triplicate. \* $P<0.05$ ; \*\* $P<0.01$  vs. control; # $P<0.05$  vs. EPA/scrambled siRNA. doi:10.1371/journal.pone.0035508.g003

abolished EPA-induced UCP-2 expression in HUVEC (Figure 3C). Consistent with these results, siRNA-mediated knockdown of UCP-2 abolished EPA-enhanced AMPK phosphorylation, while scrambled siRNA had no effect (Figure 3C). Further, infection of BAEC with adenovirus encoding constitutively active UCP-2 (Ad-CA-UCP-2) significantly increased AMPK phosphorylation (Figure 3C), indicating that UCP-2 expression was able to activate AMPK in BAEC. On the other hand, and infection of HUVEC with Ad-DN-AMPK did not alter EPA-induced UCP-2 upregulation (Figure 3D). These data indicate that UCP-2 might be required for EPA-induced AMPK activation in endothelial cells.

Because AMPK is highly sensitive to small changes in the intracellular ATP/ADP ratio [14], we explored whether EPA induces alterations in ATP/ADP through upregulation of UCP-2. To test this possibility, HUVEC were transfected with UCP-2 siRNA or control siRNA, then treated with 25  $\mu$ M EPA for 24 h. Some HUVEC were co-transfected with Ad-DN-AMPK (or with

Ad-GFP as a control) to account for slight changes in intracellular ATP levels due to AMPK activation. We found that EPA significantly decreased intracellular ATP/ADP and that UCP-2-specific siRNA blocked this effect in both Ad-DN-AMPK-transfected HUVEC and untransfected HUVEC (Figure 3E). Thus, reductions in cellular ATP levels by EPA may contribute to AMPK activation.

#### EPA stimulates UCP-2 expression partly via a PPAR $\gamma$ -mediated pathway

Thiazolidinediones, which are potent peroxisome proliferator-activated receptor- $\gamma$  (PPAR $\gamma$ ) agonists, have been shown to increase expression of UCP-2 in several tissues [32], leading to the proposal that PPAR $\gamma$  mediates changes in UCP-2 expression [33]. To test whether PPAR $\gamma$  was required for EPA-induced UCP-2 expression, we compared UCP-2 expression among BAEC

treated with EPA, Wy14643, or rosiglitazone for 24 h. Rosiglitazone, a PPAR $\gamma$  agonist, elicited a large increase in UCP-2 protein levels (~5.2-fold,  $P < 0.05$ ). This increase was of a slightly greater magnitude to that seen with EPA (Figure 4A). The other PPAR $\alpha$  agonist, Wy14643, resulted in a moderate increase in UCP-2 levels (~1.5-fold,  $P < 0.05$ ). Treatment of BAEC with GW9662, an antagonist of PPAR $\gamma$ , partially abrogated the stimulatory effect of EPA on UCP-2 protein expression (Figure 4B), while the PPAR $\alpha$  antagonist MK-886 had no effect on UCP-2 expression. These data suggest that EPA-induced upregulation of UCP-2 may be mediated, in part, by PPAR $\gamma$ .

To further verify that EPA increases endothelial UCP-2 expression and AMPK activation through PPAR $\gamma$ -dependent signaling, HUVEC were transfected with PPAR $\gamma$ -specific siRNA and assayed for PPAR $\gamma$  expression, UCP-2 expression, and AMPK phosphorylation in the presence of EPA. Western blotting verified that PPAR $\gamma$  expression was selectively and significantly reduced by the cognate PPAR $\gamma$  siRNA duplex compared with scrambled siRNA (Figure 4C). Importantly, PPAR $\gamma$  siRNA-transfected cells displayed a significant reduction in EPA-induced UCP-2 expression and AMPK phosphorylation compared with mock-transfected cells (Figure 4C).

#### EPA induces UCP-2 expression and AMPK $\alpha$ 1-mediated eNOS phosphorylation *in vivo*

To determine whether EPA activates AMPK in vasculature, C57BL/6J mice were given EPA (500 mg/kg/d in drinking water) for 4 months, and aortic levels of AMPK, ACC, and eNOS phosphorylation and UCP-2 protein expression were determined. As shown in Figure 5A, levels of Thr172-phosphorylated AMPK were significantly increased in EPA-treated animals. The phosphorylation of ACC and eNOS was also elevated to a similar degree as that for AMPK.

We also investigated if AMPK mediates the effects of EPA in an isoform-specific manner. As demonstrated in Figure 5B, administration of EPA for 4 months significantly increased the levels of Ser1177-phosphorylated eNOS in aortas from WT and AMPK $\alpha$ 2 KO mice. However, EPA activation of eNOS phosphorylation was not observed in AMPK $\alpha$ 1 KO animals, indicating that EPA-induced eNOS phosphorylation is mainly mediated by AMPK  $\alpha$ 1.

#### Role of AMPK in EPA-enhanced endothelium-dependent vasorelaxation in Apo-E $^{-/-}$ mice aortas

Next, to investigate the role of AMPK in endothelial function, we tested the effect of EPA, AICAR, and compound C on endothelium-dependent vasoreactivity under *ex-vivo* conditions. Acetylcholine (ACh) induced concentration-dependent arterial vasodilatation in all groups (Figure 6A). ACh-induced vasodilatation was markedly attenuated in Apo-E KO mice, with the maximum relaxation response of arteries being  $44.2 \pm 5.4\%$  and that from wild type mice being  $85.6 \pm 10.5\%$  ( $n = 4$  per group,  $P < 0.01$ ). It should be noted that, following treatment with AICAR or EPA, ACh-induced vasodilatation in aortas from Apo-E KO mice was significantly improved. In contrast, inhibition of AMPK with compound C abolished EPA-stimulated increases in ACh-induced relaxation in this group, where the maximal relaxation was  $76.4 \pm 5.5\%$  for EPA alone and  $52.9 \pm 7.3\%$  in the presence of compound C (Figure 6A). These data suggest that AMPK might play an important role in enhanced endothelial function elicited by EPA.

To further substantiate the role of AMPK $\alpha$ 1 in EPA-induced improvement in endothelium function, we assayed the effects of EPA in endothelium -dependent and -independent vasorelaxation in aortas isolated from Apo-E or Apo E/AMPK $\alpha$ 1 dual KO mice. As illustrated in Figure 6B, the endothelium-dependent relaxation in response to ACh was significantly reduced in the aortas of Apo-

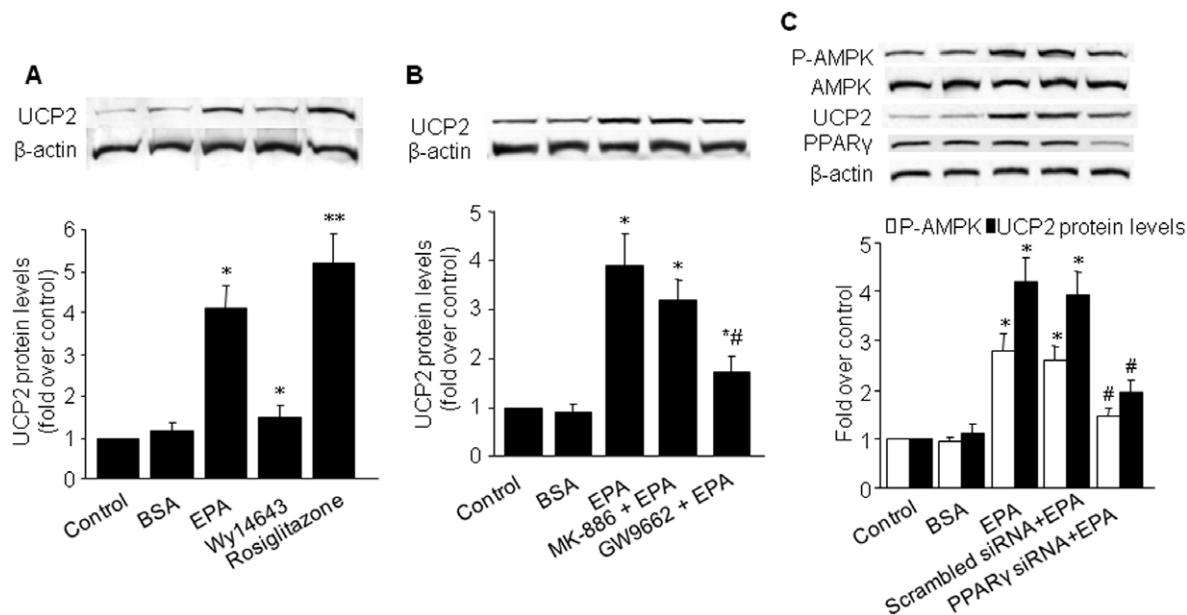

**Figure 4. EPA stimulates UCP-2 expression via a PPAR $\gamma$ -mediated pathway in BAEC.** **A, B)** Western blot analysis of UCP-2 in EPA-stimulated BAEC pretreated with 10  $\mu$ mol/L Wy14643 (PPAR $\alpha$  agonist), 10  $\mu$ mol/L rosiglitazone (PPAR $\gamma$  agonist), 10  $\mu$ mol/L MK886 (PPAR $\alpha$  antagonist), or 10  $\mu$ mol/L GW9662 (PPAR $\gamma$  antagonist). \* $P < 0.05$  vs. control; \*\* $P < 0.01$  vs. control; # $P < 0.05$  vs. EPA. **C)** Western blot analysis of AMPK, UCP-2, and PPAR $\gamma$  in EPA-stimulated HUVEC transfected with PPAR $\gamma$  siRNA or scrambled siRNA for 48 h. \* $P < 0.05$  vs. control; # $P < 0.05$  vs. scrambled siRNA + EPA. For A–C, the blot is a representative of four blots obtained from four separate experiments, and the corresponding densitometric analyses are shown.

doi:10.1371/journal.pone.0035508.g004



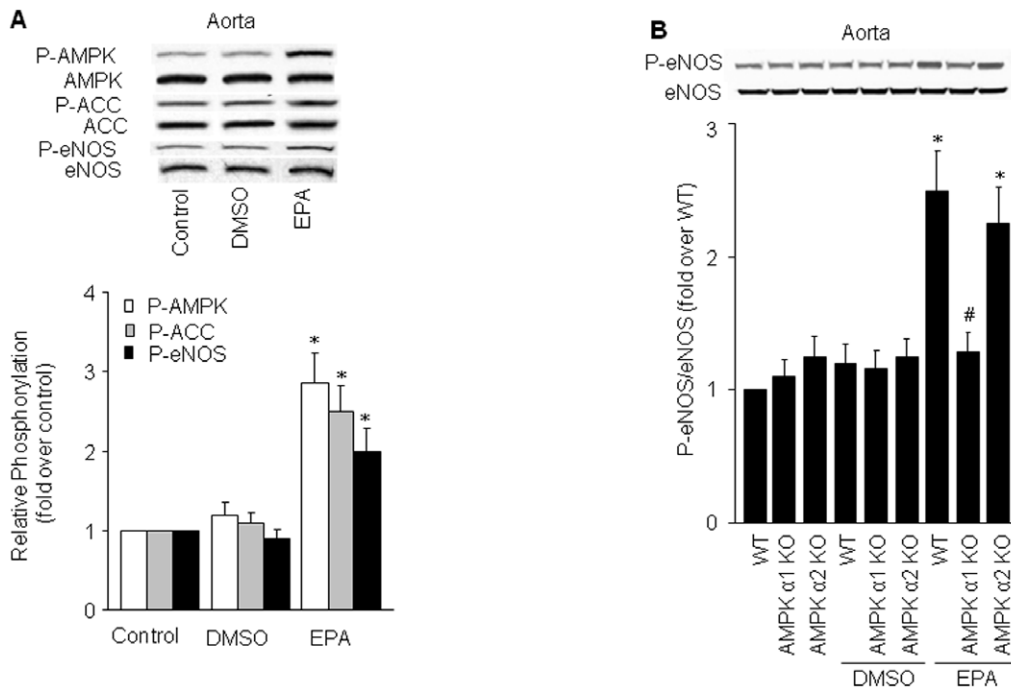

**Figure 5. EPA upregulates UCP-2 and activates AMPK in mice.** **A**) Western blot analysis of phosphorylated AMPK, ACC, and eNOS in the thoracic aorta of mice receiving EPA or DMSO (vehicle) in their drinking water for 16 weeks ( $n=3$  for each group). Corresponding densitometric analyses are shown.  $*P<0.05$  vs. control. **B**) Western blot analysis of eNOS phosphorylation in wild type (WT), AMPK $\alpha$ 1 knock out (KO), and AMPK $\alpha$ 2 KO mice receiving EPA for 16 weeks ( $n=3$  for each group). The relative p-eNOS/eNOS ratios are shown.  $*P<0.05$  vs. non-treated WT;  $*P<0.05$  vs. EPA-treated WT;  $*P<0.05$  vs. control;  $**P<0.01$  vs. control. doi:10.1371/journal.pone.0035508.g005

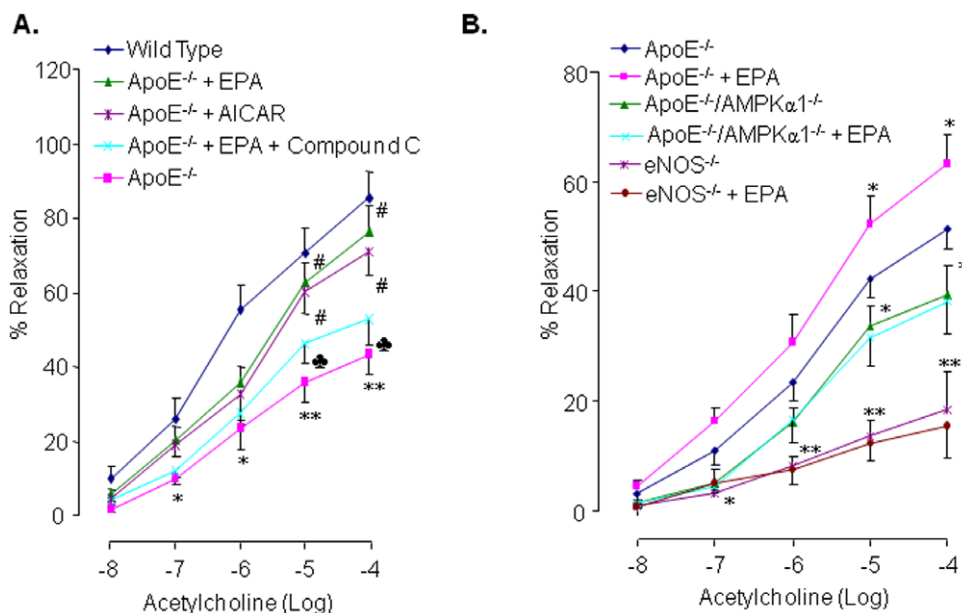

**Figure 6. Both AMPK  $\alpha$ 1 and NO are required for EPA-enhanced endothelium-dependent vasodilation *in ex vivo* or *in vivo*.** **A**) Endothelium-dependent relaxation of the aortic rings in response to acetylcholine (ACh) from wild type or Apo-E<sup>-/-</sup> mice. Aortic rings were pretreated  $\pm$  compound C, then incubated with EPA or AICAR ( $n=4$  for each group). Each data point represents relaxation expressed as a percentage of the value obtained for phenylephrine-precontracted aorta.  $*P<0.05$  vs. wild type;  $**P<0.01$  vs. wild type;  $\#P<0.05$  vs. Apo-E<sup>-/-</sup>;  $P<0.05$  vs. Apo-E<sup>-/-</sup> + EPA. **B**) AMPK $\alpha$ 1 and eNOS are required for EPA-induced amelioration of endothelium function. Aortic rings extracted from Apo-E KO, Apo-E/AMPK $\alpha$ 1 dual KO or eNOS KO mice were incubated with or without EPA (25  $\mu$ M) for 24 h in EBM. The endothelium-dependent relaxation were assayed by the addition of acetylcholine at concentrations indicated ( $n=4$  for each group).  $*P<0.05$ ;  $**P<0.01$  vs. Apo-E<sup>-/-</sup> mice. doi:10.1371/journal.pone.0035508.g006

E/AMPK $\alpha$ 1 dual KO mice when compared with those of Apo-E KO mice. Further, EPA significantly increased Ach-induced endothelium-dependent relaxation in Apo-E KO but not in the aortas from Apo-E/AMPK $\alpha$ 1 dual KO mice (Figure 6B), suggesting that AMPK $\alpha$ 1 was required for EPA-enhanced endothelium-dependent vasorelaxation *ex vivo*.

To further determine the contribution of eNOS in EPA-enhanced relaxation, we next determined the effect of EPA in the aortas from eNOS KO mice. As expected, endothelium-dependent relaxation in response to Ach was minimal (Figure 6B). In addition, EPA at 25  $\mu$ M did not alter Ach-induced relaxation in the aortas from eNOS KO mice. As endothelium-independent vasorelaxation caused by sodium nitroprusside were similar among Apo-E KO, eNOS KO, and Apo-E/AMPK  $\alpha$ 1 KO (data not shown). Overall, our results implied that eNOS was required for EPA-enhanced endothelium-dependent relaxation at the doses tested.

## Discussion

AMPK is activated by a rise in AMP and a decrease in ATP, both of which occur by inhibiting ATP production or accelerating ATP consumption [14]. The uncoupling proteins (UCP1, UCP2, and UCP3) are mitochondrial transporters that are capable of dissipating the proton gradient and increasing thermogenesis, while reducing the efficiency of ATP synthesis [34]. Since AMPK is potently stimulated by depletion of intracellular ATP (or increased AMP:ATP) resulting from the upregulation of UCP-2 in target tissues [35], a possible functional link between these two intracellular systems has emerged. In the present study, we have for the first time provided evidence that EPA via UCP-2 expression increases NO release and endothelial function via AMPK activation *in vivo*. The beneficial effects of EPA appear independent of serum lipids and EPA via AMPK activation exerts a direct vasoprotective effect. Furthermore, we have characterized that UCP-2 mediates AMPK responses to EPA in endothelial cells. Indeed, our data reveal that EPA significantly increases UCP-2 protein expression and AMPK phosphorylation both *in vitro* and *in vivo*. The upregulation of UCP-2 by EPA is consistent with the findings reported by Armstrong *et al.* [36] Moreover, all classes of unsaturated FFA and/or their metabolites have been shown to upregulate UCP-2 mRNA in cultured cells [37,38]. Indeed, siRNA-mediated knockdown of UCP-2 protein blocked EPA stimulation of AMPK phosphorylation, and overexpression of UCP-2 directly increased AMPK phosphorylation. These findings support a role for UCP-2 in EPA-induced activation of AMPK.

The mechanism by which EPA increases UCP-2 expression remains unclear. We observed a significant increase in UCP-2 expression after exposure to EPA or PPAR $\gamma$  agonist (rosiglitazone), while only modest increases in UCP-2 expression were observed with the PPAR $\alpha$  agonist (Wy14643). The PPAR $\gamma$  antagonist (GW9662) but not the PPAR $\alpha$  antagonist (MK-886) significantly blocked EPA-induced upregulation of UCP-2. These results could be further substantiated using specific PPAR $\gamma$  siRNA. Together, these data suggest that EPA induction of UCP-2 expression was mediated partly by PPAR $\gamma$ .

Another important observation of the present study is that chronic EPA supplementation significantly increased eNOS Ser1177 phosphorylation, NO release, and Ach-induced endothelium-dependent relaxation. Further, we have provided evidence that AMPK was required for increased NO bioactivity. Finally, we have shown that AMPK might have direct vaso-protective effects as EPA supplementation improves endothelial function without altering lipids in serum. Our results strongly imply that a direct

activation of AMPK in endothelial cells might have broad physiological effects, leading to improvement of endothelial function. In addition to activating eNOS, activated AMPK increases fatty acid oxidation by phosphorylating and inhibiting ACC, which serves to decrease the concentrations of malonyl-CoA [39]. Decreased malonyl-CoA could, in turn, inhibit the accumulation of lipids associated with endothelial dysfunction, which is the precursor of atherosclerosis [40]. Activation of AMPK also decreases fatty acid incorporation into glycerolipids, either secondary to its effect on fatty acid oxidation or through its ability to phosphorylate and inhibit sn-glycerophosphate acyltransferase, the first committed enzyme in diacylglycerol and triglyceride synthesis [41]. An additional benefit of endothelial AMPK activity is that it may inhibit glycerol-3-phosphate acyltransferase, which is required for the *de novo* synthesis of diacylglycerol [41]. In this way, AMPK may lessen endothelial diacylglycerol production (and thus PKC activation) by diminishing availability of the FFA substrate for its synthesis and by directly inhibiting the enzyme which catalyzes its synthesis. The importance of AMPK in the development of endothelial dysfunction and atherosclerosis is best demonstrated by recent studies showing that metformin, one of the most used anti-diabetic drugs which was recently to exert its therapeutic effect in diabetes by activating AMPK [42,43], has been shown to improve vascular functions and to dramatically reduce cardiovascular endpoints and mortality for type II diabetic patients in large scale clinical trials [44,45,46].

In summary, we have uncovered a novel pathway by which the  $\omega$ -3 fatty acid EPA activates AMPK in endothelial cells. This pathway, which relies on UCP-2 as a mediator of AMPK activation, stimulates NO production through eNOS phosphorylation. Thus, AMPK activation may help account for the beneficial effects of fish oil on endothelial function and atherosclerosis.

## Materials and Methods

### Materials

Bovine aortic endothelial cells (BAEC) and cell culture media were obtained from Clonetics Inc. (Walkersville, MD). Human umbilical vein endothelial cells (HUVEC) and cell culture media were purchased from Cascade Biologics (Portland, OR). FFA-free bovine serum albumin (BSA), palmitic acid, oleic acid, GW9662, and MK-886 were obtained from Sigma (St. Louis, MO). Wy14643 and rosiglitazone were obtained from Cayman Chemical Co. (Ann Arbor, Michigan, USA), and 5-aminoimidazole-4-carboxamide-1- $\beta$ -D-ribofuranoside (AICAR) was purchased from Toronto Research Chemicals, Inc (Toronto, Canada). Antibodies against phospho-acetyl-CoA carboxylase (ACC) (Ser79), phospho-AMPK (Thr172), AMPK, and phospho-eNOS (Ser1177) were purchased from Cell Signaling Inc. (Beverly, MA). The antibodies against ACC were obtained from Alpha Diagnostic International, Inc. (San Antonio, TX). All other chemicals and organic solvents were of the highest grade and were obtained from Sigma.

### Animals

To generate Apo-E/AMPK dual knockout (KO) mice, Apo-E KO mice obtained from Jackson Labs were crossbred for at least 5 generation with the mice deficient of AMPK  $\alpha$ 1. Deficiency of both Apo-E and AMPK  $\alpha$ 1 was confirmed by both RT-PCR and western blots by using the specific antibody against AMPK  $\alpha$ 1. As both AMPK KO mice and Apo-E KO had extensively been backcrossed to the C57BL6 background, C57BL6 mice aged 8-months were used as wild type control (WT) in the study. All animal protocols were approved by the Institutional Animal Care

and Use Committee at University of Oklahoma Health Sciences Center.

### Cell culture, addition of EPA and adenoviral infection

BAEC were grown in EBM supplemented with 2% fetal bovine serum (FBS). HUVEC were maintained in Medium 200 supplemented with a low serum growth supplement (LSGS) before use. All culture media were supplemented with both penicillin (100 Units/ml) and streptomycin (100 µg/ml). Cells between passages 5 and 10 were used for all experiments. All cells were incubated in a humidified atmosphere of 5% CO<sub>2</sub>/95% air at 37°C. The fatty acids were added to the cell cultures coupled to fatty acid-free BSA in the ratio of 2 mol of fatty acid to 1 mol of albumin [47]. When the ECs were 90% confluent, the maintenance medium was removed and cells were treated with EPA (0 to 100 µmol/L), in medium with 2% FCS for 0 to 24 h. In other studies, BAEC or HUVEC were infected with adenoviruses encoding green fluorescence protein (GFP) as a control (Ad-GFP), constitutively active human UCP2 (Ad-CA-UCP2), or a dominant negative mutant form of AMPK alpha (Ad-DN-AMPK). The AMPK-DN adenoviral vector was constructed from AMPK bearing a mutation altering lysine 45 to arginine (K45R) as described previously [42,48]. Infection was performed in 80% confluent cultures with media containing 0.1% FCS and recombinant adenovirus at a multiplicity of infection of 50. Cells were further incubated with EBM for additional 24 h (HUVEC) or 48 h (BAEC) before experimentation. Using these conditions, infection efficiency was typically at least 80%, as determined by GFP expression.

### siRNA silencing of PPAR $\gamma$ or UCP2 in HUVEC

HUVEC (passages 3–5) were grown in antibiotic free-EGM-2 medium containing 2% FBS until 70% confluence and transfected with human-specific PPAR $\gamma$  siRNA, UCP2 siRNA, or corresponding scrambled siRNA for 48 h using Lipofectamine<sup>TM</sup> 2000 (Invitrogen) according to the manufacturer's instructions. The final concentration of siRNA was 200 nM.

### Measurement of nitric oxide production

For NO detection, BAEC grown in 24-well plates were incubated for 30 min in the presence of 15 µM 4,5-diaminofluorescein diacetate (DAF-2 DA) in PBS or in PBS alone (control) in the dark at 37°C. Cells were then washed with PBS to remove excessive DAF-2 DA, and the change in fluorescence was recorded for 15 min at room temperature using a microplate reader (FL 600, Bio-Tek) with the excitation wavelength set at 485 nm and the emission wavelength set at 530 nm. Changes in fluorescence were also visualized with a fluorescence microscope (Olympus IX71), and images were captured for analysis [49].

### Determination of adenine nucleotides

HUVEC were cultured in 6-well plates with control siRNA or UCP2 siRNA for 48 h, treated with EPA or vehicle for 24 h,

washed with PBS, and scraped in 0.3 ml of PBS. ATP and ADP were then measured in quadruplicate by a luminometric method as described elsewhere [50].

### Western blot analysis

BAEC or HUVEC and thawed mouse aortas were lysed in cold RIPA buffer. Protein concentrations were determined with a bicinchoninic acid (BCA) protein assay system (Pierce, Rockford, IL). Proteins were subjected to Western blots using ECL-Plus, as described previously [42]. Relative PPAR $\gamma$  protein expression was measured in nuclear extracts from HUVEC as previously detailed [51]. The intensity (area  $\times$  density) of the individual bands on Western blots was measured by densitometry (model GS-700, Imaging Densitometer; Bio-Rad). The background was subtracted from the calculated area.

### AMPK activity assay

AMPK activity was assayed using the SAMS peptide, as previously described [48]. The activity was determined in the presence and absence of AMP (200 µM). AMPK activity was calculated by determining the difference in activity between both conditions.

### Measurement of endothelium-dependent and endothelium-independent vasorelaxation

Aortic rings (3–4 mm in length) extracted from C57BL6 aged 8-weeks, 20-weeks, 4-months or 8-months (wild type, WT), Apo-E KO aged 8-months, Apo-E/AMPK dual KO mice (8-month old) or eNOS KO (8-week old) were further incubated with EPA (25 µM) or AICAR (2 mM) in endothelial cell basal media (EBM) for 24 h. After that, aortic rings were pre-constricted with phenylephrine in organ chambers (PowerLab, AD Instruments, Colorado Springs, CO). Endothelium-dependent and independent vasodilation responses were determined in the presence of acetylcholine (0.01 to 100 µM) and SNP (0.0001 to 1 µM), respectively. When indicated, compound C (20 µM) were added 30 min prior to addition of EPA.

### Statistics

Statistical comparisons of vasodilation were performed using a two-way ANOVA. Intergroup differences were analyzed using Bonferroni's post test. Analysis of time-course studies was performed with repeated measures ANOVA. All other results were analyzed with one-way ANOVA. Values are expressed as mean  $\pm$  SD. P values less than 0.05 were considered as significant.

### Author Contributions

Conceived and designed the experiments: YW MZ. Performed the experiments: YW CZ YD SW PS. Analyzed the data: YW CZ YD SW PS. Contributed reagents/materials/analysis tools: BV. Wrote the paper: YW MZ.

### References

- Krauss RM, Eckel RH, Howard B, Appel LJ, Daniels SR, et al. (2000) AHA Dietary Guidelines: revision 2000: A statement for healthcare professionals from the Nutrition Committee of the American Heart Association. *Circulation* 102: 2284–2299.
- Kris-Etherton PM, Harris WS, Appel LJ (2002) Fish consumption, fish oil, omega-3 fatty acids, and cardiovascular disease. *Circulation* 106: 2747–2757.
- Harris WS (1989) Fish oils and plasma lipid and lipoprotein metabolism in humans: a critical review. *J Lipid Res* 30: 785–807.
- Johansen O, Seljeflot I, Hostmark AT, Arnesen H (1999) The effect of supplementation with omega-3 fatty acids on soluble markers of endothelial function in patients with coronary heart disease. *Arterioscler Thromb Vasc Biol* 19: 1681–1686.
- McVeigh GE, Brennan GM, Cohn JN, Finkelstein SM, Hayes RJ, et al. (1994) Fish oil improves arterial compliance in non-insulin-dependent diabetes mellitus. *Arterioscler Thromb* 14: 1425–1429.
- Alexander JW (1998) Immunonutrition: the role of omega-3 fatty acids. *Nutrition* 14: 627–633.
- Chen LY, Jokela R, Li DY, Bavry AA, Sandler H, et al. (2000) Effect of stable fish oil on arterial thrombogenesis, platelet aggregation, and superoxide dismutase activity. *J Cardiovasc Pharmacol* 35: 502–505.



8. Davignon J, Ganz P (2004) Role of endothelial dysfunction in atherosclerosis. *Circulation* 109: III-27–III-32.
9. Nishimura M, Nanbu A, Komori T, Ohtsuka K, Takahashi H, et al. (2000) Eicosapentaenoic acid stimulates nitric oxide production and decreases cardiac noradrenaline in diabetic rats. *Clin Exp Pharmacol Physiol* 27: 618–624.
10. Connor SL, Connor WE (1997) Are fish oils beneficial in the prevention and treatment of coronary artery disease? *Am J Clin Nutr* 66: 1020S–1031S.
11. Ogita H, Node K, Asanuma H, Sanada S, Takashima S, et al. (2003) Eicosapentaenoic acid reduces myocardial injury induced by ischemia and reperfusion in rabbit hearts. *J Cardiovasc Pharmacol* 41: 964–969.
12. Wu G, Meininger CJ (2002) Regulation of nitric oxide synthesis by dietary factors. *Annu Rev Nutr* 22: 61–86.
13. Saraswathi V, Wu G, Toborek M, Hennig B (2004) Linoleic acid-induced endothelial activation: role of calcium and peroxynitrite signaling. *J Lipid Res* 45: 794–804.
14. Kemp BE, Stapleton D, Campbell DJ, Chen ZP, Murthy S, et al. (2003) AMP-activated protein kinase, super metabolic regulator. *Biochem Soc Trans* 31: 162–168.
15. McBride A, Ghilagaber S, Nikolaev A, Hardie DG (2009) The glycogen-binding domain on the AMPK beta subunit allows the kinase to act as a glycogen sensor. *Cell Metab* 9: 23–34.
16. Stahmann N, Woods A, Carling D, Heller R (2006) Thrombin activates AMP-activated protein kinase in endothelial cells via a pathway involving Ca<sup>2+</sup>/calmodulin-dependent protein kinase beta. *Mol Cell Biol* 26: 5933–5945.
17. Zou MH, Hou XY, Shi CM, Kirkpatrick S, Liu F, et al. (2003) Activation of 5'-AMP-activated kinase is mediated through c-Src and phosphoinositide 3-kinase activity during hypoxia-reoxygenation of bovine aortic endothelial cells. Role of peroxynitrite. *J Biol Chem* 278: 34003–34010.
18. Choi HC, Song P, Xie Z, Wu Y, Xu J, et al. (2008) Reactive nitrogen species is required for the activation of the AMP-activated protein kinase by statin in vivo. *J Biol Chem* 283: 20186–20197.
19. Hardie DG, Salt IP, Hawley SA, Davies SP (1999) AMP-activated protein kinase: an ultrasensitive system for monitoring cellular energy charge. *Biochem J* 338(Pt 3): 717–722.
20. Hawley SA, Boudeau J, Reid JL, Mustard KJ, Udd L, et al. (2003) Complexes between the LKB1 tumor suppressor, STRAD alpha/beta and MO25 alpha/beta are upstream kinases in the AMP-activated protein kinase cascade. *J Biol* 2: 28.
21. Hurley RL, Anderson KA, Franzone JM, Kemp BE, Means AR, et al. (2005) The Ca<sup>2+</sup>/calmodulin-dependent protein kinase kinases are AMP-activated protein kinase kinases. *J Biol Chem* 280: 29060–29066.
22. Chen H, Montagnani M, Funahashi T, Shimomura I, Quon MJ (2003) Adiponectin stimulates production of nitric oxide in vascular endothelial cells. *J Biol Chem* 278: 45021–45026.
23. Zou MH, Hou XY, Shi CM, Nagata D, Walsh K, et al. (2002) Modulation by peroxynitrite of Akt- and AMP-activated kinase-dependent Ser1179 phosphorylation of endothelial nitric oxide synthase. *J Biol Chem* 277: 32552–32557.
24. Ouchi N, Kobayashi H, Kihara S, Kumada M, Sato K, et al. (2004) Adiponectin stimulates angiogenesis by promoting cross-talk between AMP-activated protein kinase and Akt signaling in endothelial cells. *J Biol Chem* 279: 1304–1309.
25. Schulz E, Anter E, Zou MH, Keaney JF, Jr. (2005) Estradiol-mediated endothelial nitric oxide synthase association with heat shock protein 90 requires adenosine monophosphate-dependent protein kinase. *Circulation* 111: 3473–3480.
26. Hawley SA, Davison M, Woods A, Davies SP, Beri RK, et al. (1996) Characterization of the AMP-activated protein kinase kinase from rat liver and identification of threonine 172 as the major site at which it phosphorylates AMP-activated protein kinase. *J Biol Chem* 271: 27879–27887.
27. Ruderman NB, Saha AK, Vavvas D, Witters LA (1999) Malonyl-CoA, fuel sensing, and insulin resistance. *Am J Physiol* 276: E1–E18.
28. Zhang Y, Lee TS, Kolb EM, Sun K, Lu X, et al. (2006) AMP-activated protein kinase is involved in endothelial NO synthase activation in response to shear stress. *Arterioscler Thromb Vasc Biol* 26: 1281–1287.
29. Dimmeler S, Fleming I, Fisslthaler B, Hermann C, Busse R, et al. (1999) Activation of nitric oxide synthase in endothelial cells by Akt-dependent phosphorylation. *Nature* 399: 601–605.
30. Lizcano JM, Goransson O, Toth R, Deak M, Morrice NA, et al. (2004) LKB1 is a master kinase that activates 13 kinases of the AMPK subfamily, including MARK/PAR-1. *Embo J* 23: 833–843.
31. Mattiasson G, Sullivan PG (2006) The emerging functions of UCP2 in health, disease, and therapeutics. *Antioxid Redox Signal* 8: 1–38.
32. Camirand A, Marie V, Rabelo R, Silva JE (1998) Thiazolidinediones stimulate uncoupling protein-2 expression in cell lines representing white and brown adipose tissues and skeletal muscle. *Endocrinology* 139: 428–431.
33. Medvedev AV, Snedden SK, Raimbault S, Ricquier D, Collins S (2001) Transcriptional regulation of the mouse uncoupling protein-2 gene. Double E-box motif is required for peroxisome proliferator-activated receptor-gamma-dependent activation. *J Biol Chem* 276: 10817–10823.
34. Dulloo AG, Samec S (2001) Uncoupling proteins: their roles in adaptive thermogenesis and substrate metabolism reconsidered. *Br J Nutr* 86: 123–139.
35. Hardie DG, Hawley SA (2001) AMP-activated protein kinase: the energy charge hypothesis revisited. *Bioessays* 23: 1112–1119.
36. Armstrong MB, Towle HC (2001) Polyunsaturated fatty acids stimulate hepatic UCP-2 expression via a PPARalpha-mediated pathway. *Am J Physiol Endocrinol Metab* 281: E1197–1204.
37. Reilly JM, Thompson MP (2000) Dietary fatty acids Up-regulate the expression of UCP2 in 3T3-L1 preadipocytes. *Biochem Biophys Res Commun* 277: 541–545.
38. Aubert J, Champigny O, Saint-Marc P, Negrel R, Collins S, et al. (1997) Up-regulation of UCP-2 gene expression by PPAR agonists in preadipose and adipose cells. *Biochem Biophys Res Commun* 238: 606–611.
39. Ruderman NB, Cacicedo JM, Itani S, Yagihashi N, Saha AK, et al. (2003) Malonyl-CoA and AMP-activated protein kinase (AMPK): possible links between insulin resistance in muscle and early endothelial cell damage in diabetes. *Biochem Soc Trans* 31: 202–206.
40. Hennig B, Toborek M, McClain CJ, Diana JN (1996) Nutritional implications in vascular endothelial cell metabolism. *J Am Coll Nutr* 15: 345–358.
41. Park H, Kaushik VK, Constant S, Prentki M, Przybytkowski E, et al. (2002) Coordinate regulation of malonyl-CoA decarboxylase, sn-glycerol-3-phosphate acyltransferase, and acetyl-CoA carboxylase by AMP-activated protein kinase in rat tissues in response to exercise. *J Biol Chem* 277: 32571–32577.
42. Davis BJ, Xie Z, Viollet B, Zou MH (2006) Activation of the AMP-activated kinase by antidiabetic drug metformin stimulates nitric oxide synthesis in vivo by promoting the association of heat shock protein 90 and endothelial nitric oxide synthase. *Diabetes* 55: 496–505.
43. Zhou G, Myers R, Li Y, Chen Y, Shen X, et al. (2001) Role of AMP-activated protein kinase in mechanism of metformin action. *J Clin Invest* 108: 1167–1174.
44. Marfella R, Acampora R, Verrazzo G, Ziccardi P, De Rosa N, et al. (1996) Metformin improves hemodynamic and rheological responses to L-arginine in NIDDM patients. *Diabetes Care* 19: 934–939.
45. Turner RC, Holman RR (1995) Lessons from UK prospective diabetes study. *Diabetes Res Clin Pract* 28 Suppl: S151–157.
46. UK Prospective Diabetes Study (UKPDS) Group (1998) Effect of intensive blood-glucose control with metformin on complications in overweight patients with type 2 diabetes (UKPDS 34). *Lancet* 352: 854–865.
47. Rotstein NP, Aveland MI, Barrantes FJ, Politi LE (1996) Docosahexaenoic acid is required for the survival of rat retinal photoreceptors in vitro. *J Neurochem* 66: 1851–1859.
48. Zou MH, Kirkpatrick SS, Davis BJ, Nelson JS, Wiles WG, 4th, et al. (2004) Activation of the AMP-activated protein kinase by the anti-diabetic drug metformin in vivo. Role of mitochondrial reactive nitrogen species. *J Biol Chem* 279: 43940–43951.
49. Hu H, Xin M, Belayev LL, Zhang J, Block ER, et al. (2004) Autoinhibitory domain fragment of endothelial NOS enhances pulmonary artery vasorelaxation by the NO-cGMP pathway. *Am J Physiol Lung Cell Mol Physiol* 286: L1066–1074.
50. Patane G, Anello M, Piro S, Vigneri R, Purrello F, et al. (2002) Role of ATP production and uncoupling protein-2 in the insulin secretory defect induced by chronic exposure to high glucose or free fatty acids and effects of peroxisome proliferator-activated receptor-gamma inhibition. *Diabetes* 51: 2749–2756.
51. Marx N, Bourcier T, Sukhova GK, Libby P, Plutzky J (1999) PPARgamma activation in human endothelial cells increases plasminogen activator inhibitor type-1 expression: PPARgamma as a potential mediator in vascular disease. *Arterioscler Thromb Vasc Biol* 19: 546–551.
